# Supplementary material
Source: Research Square preprint supplement (doi:10.21203/rs.3.rs-9124398/v1)
Supplement: Supplementary file 1 [file 81db6022fe2cd8119eeabfba.docx]

**SUPPLEMENTARY MATERIAL 1 – List of International Classification of Diseases (ICD) and International Classification of Primary Care (ICPC) codes erelated to “problems or conditions assessed – mental health,” according to the Primary Care Information System (SISAB).**

| ICPC - International Classification of Primary Care |
| --- |
| P02 - Acute stress reaction; P06 - Sleep disturbance; P10 - Stuttering/stammering/tics; P11 - Child feeding problems; P12 - Bedwetting/enuresis; P13 - Encopresis/other fecal incontinence problems; P22 - Signs/symptoms of child behavior; P23 - Signs/symptoms of adolescent behavior; P24 - Specific learning difficulties; P29 - Psychological signs/symptoms, other; P70 - Dementia; P71 - Other organic psychoses N; P72 -Schizophrenia; P73 - Affective psychosis; P74 - Anxiety disorder/anxiety state; P75 - Somatization; P76 - Depressive disorders; P78 - Neurasthenia/surmenage; P79 - Phobia/compulsive disorder; P80 – Personality disorders; P81 - Hyperkinetic disorder; P85 - Mental retardation; P98 - Other psychoses NE; P99 – Other psychological disorders. |
| ICD - International Classification of Diseases |
| F00 - Dementia in Alzheimer's disease; F000 - Dementia in early-onset Alzheimer's disease; F001 - Dementia in lateonset Alzheimer's disease; F002 - Dementia in atypical or mixed Alzheimer's disease; F009 - Unspecified dementia in Alzheimer's disease; F01 - Vascular Dementia; F010 - Vascular Dementia, Acute Onset; F011 - Dementia Due to Multiple Infarcts; F012 - Subcortical Vascular Dementia; F013 - Mixed Vascular Dementia, Cortical and Subcortical; F018 - Other Vascular Dementia; F019 - Vascular Dementia, Unspecified; F02 - Dementia in Other Diseases Classified Elsewhere; F020 - Dementia of Pick's Disease; F021 - Dementia in Creutzfeldt-Jakob Disease; F022 - Dementia in Huntington's Disease; F023 - Dementia in Parkinson's Disease; F024 - Dementia in Human Immunodeficiency Virus [HIV] Disease; F028 - Dementia in Other Specified Diseases Classified Elsewhere; F03 - Unspecified Dementia; F04 - Organic Amnesic Syndrome Not Induced by Alcohol or Other Psychoactive Substances;  F05 - Delirium Not Induced by Alcohol or Other Psychoactive Substances; F050 - Delirium Not Superimposed on Dementia, Thus Described; F051 - Delirium Superimposed on Dementia; F058 - Other Delirium; F059 - Delirium Not Specified; F06 - Other Mental Disorders Due to Brain Injury and Dysfunction and Physical Disease; F060 – Organic Hallucinosis; F061 - Organic Catatonic State; F062 - Organic Delusional Disorder [Schizophrenic Type]; F063 - Organic Mood [Affective] Disorders ; F064 - Organic Anxiety Disorders; F065 - Organic Dissociative Disorder; F066  - Organic Emotional Lability Disorder [Asthenic]; F067 - Mild Cognitive Disorder; F068 - Other Specified Mental Disorders Due to Brain Injury and Dysfunction and Physical Illness; F069 - Unspecified Mental Disorder Due to Brain Injury and Dysfunction and Physical Illness; F070 - Organic Mental Disorder Due to Brain Injury and Dysfunction and Physical Illness; F071 - Organic Mental Disorder Due to Brain Injury and Dysfunction and Physical Illness; F072 - Organic Mental Disorder Due to Brain Injury and Dysfunction and Physical Illness; F073 - Organic Mental Disorder Due to Brain Injury and Dysfunction and Physical Illness; F074 - Organic Mental Disorder Due to Brain Injury and Dysfunction and Physical Illness; F075 - Organic Mental Disorder Due to Brain Injury and Dysfunction and Physical  Illness; F076 - Organic Mental Disorder Due to Brain Injury and Dysfunction and Physical Illness; F077 – Organic Mental Disorder Due to Brain Injury and Dysfunction and Physical Illness; F078 - Organic Mental Disorder Due to Brain Injury and Dysfunction and Physical Illness; F079 - Organic Due to Brain Injury and Dysfunction and Physical Illness; F069 - Unspecified Mental Disorder Due to Brain Injury and Dysfunction and Physical Illness; F07 - Personality and Behavioral Disorders Due to Disease, Injury, and Brain Dysfunction; F070 - Organic Personality Disorder; F071 - Postencephalitic Syndrome; F072 - Posttraumatic Syndrome; F078 - Other Organic Personality and Behavioral Disorders Due to Brain Disease, Injury, and Dysfunction; F079 - Unspecified Organic Personality Disorder  Due to Brain Disease, Injury, and Dysfunction; Due to Brain Disease, Injury, and Dysfunction; F079 – Unspecified Organic Personality and Behavior Due to Brain Disease, Injury, and Dysfunction; F09 - Unspecified Organic or Symptomatic Mental Disorder; F20 - Schizophrenia; F200 - Paranoid Schizophrenia; F201 – Hebephrenic Schizophrenia; F202 - Catatonic Schizophrenia; F203 - Undifferentiated Schizophrenia; F204 - Post-Schizophrenic Depression; F205 - Residual Schizophrenia; F206 - Simple Schizophrenia; F208 - Other Schizophrenias; F209 - Unspecified Schizophrenia; F21 - Schizotypal Disorder; F22 - Persistent Delusional Disorders; F220 – Delusional Disorder; F228 - Other Persistent Delusional Disorders; F229 - Unspecified Persistent Delusional Disorder; F23 -  Acute and Transient Psychotic Disorders; F230 - Acute Polymorphic Psychotic Disorder, Without Schizophrenic Symptoms; F231 - Acute Polymorphic Psychotic Disorder, With Schizophrenic Symptoms; F232 – Disorder Acute Psychotic Disorder of Schizophrenia-Like Type; F233 - Other Acute Psychotic Disorders Psicótico Agudo De Tipo Esquizofrênico (Schizophrenia-Like); Acute, Essentially Delusional; F238 - Other Acute and Transient Psychotic Disorders; F239 - Acute and Transient Psychotic Disorder, Unspecified; F24 - Induced Delusional Disorder; F25 - Schizoaffective Disorders; F250 -  Schizoaffective Disorder, Manic Type; F251 - Schizoaffective Disorder, Depressive Type; F252 – Schizoaffective Disorder, Mixed Type; F258 - Other Schizoaffective Disorders; F259 - Schizoaffective Disorder, Unspecified; F28 - Other Non-Organic Psychotic Disorders; F29 - Non-Organic Psychosis, Unspecified; F30 - Manic Episode; F300 - Hypomania; F301 - Mania Without Psychotic Symptoms; F302 - Mania With Psychotic Symptoms; F308 – Other Manic Episodes; F309 - Unspecified Manic Episode; F31 - Bipolar Affective Disorder; F310 - Bipolar Affective Disorder, Current Hypomanic Episode; F311 - Bipolar Affective Disorder, Current Manic Episode Without Psychotic Symptoms; F312 - Bipolar Affective Disorder, Current Manic Episode With Psychotic Symptoms; F313 – Bipolar Affective Disorder, Current Mild or Moderate Depressive Episode; F314 - Bipolar Affective Disorder, Current Severe  Depressive Episode Without Psychotic Symptoms; F315 - Bipolar Affective Disorder, Current Severe Depressive Episode With Psychotic Symptoms; F316 - Bipolar Affective Disorder, Current Mixed Episode; F317 – Bipolar Affective Disorder, Currently in Remission; F318 - Other Bipolar Affective Disorders; F319 - Bipolar Affective Disorder, Unspecified; F32 - Depressive Episodes; F320 - Mild Depressive Episode; F321 - Moderate Depressive Episode; F322 - Severe Depressive Episode Without Psychotic Symptoms; F323 - Severe Depressive Episode With Psychotic Symptoms; F328 - Other Depressive Episodes; F329 - Unspecified Depressive Episode; F33 – Recurrent Depressive Disorder; F330 - Recurrent Depressive Disorder, Current Episode Mild; F331 - Recurrent Depressive  Disorder, Current Episode Moderate; F332 - Recurrent Depressive Disorder, Current Episode Severe Without Psychotic Symptoms; F333 - Recurrent Depressive Disorder, Current Episode Severe With Psychotic Symptoms; F334 - Recurrent Depressive Disorder, Currently In Remission; F338 - Other Recurrent Depressive Disorders; F339 - Recurrent Depressive Disorder Without Specification; F34 - Persistent Mood [Affective] Disorders; F340 - Cyclothymia; F341 - Dysthymia; F348 - Other Persistent Mood [Affective] Disorders; F349 - Persistent Mood [Affective] Disorder Not Specified; F38  - Other Mood Disorders [Affective]; F380 - Other Mood Disorders [Affective] Isolated; F381 - Other Mood Disorders [Affective]; F388 - Other Specified Mood [Affective] Disorders; F39- Mood [Affective] Disorder, Unspecified; F40 - Phobic-Anxiety Disorders; F400 - Agoraphobia; F401 - Social Phobias; F402 - Specific Phobias (Isolated); F408 - Other Phobic-Anxiety Disorders; F409 - Phobic-Anxiety Disorder Not Specified; F41 - Other Anxiety Disorders; F410 - Panic Disorder [Episodic Paroxysmal Anxiety]; F411 - Generalized Anxiety; F412 - Mixed Anxiety and Depressive Disorder; F413 - Other Mixed Anxiety Disorders; F418 - Other Specified Anxiety Disorders; F419 - Anxiety Disorder Not Otherwise Specified; F42 - Obsessive-Compulsive Disorder; F420 - Obsessive-Compulsive Disorder With Predominance Of Obsessive Ideas Or Ruminations; F421 - Obsessive-Compulsive Disorder With Predominance Of Compulsive Behaviors [Obsessive Rituals]; F422 - Obsessive-Compulsive Disorder, Mixed Form,  With Obsessive Ideas and Compulsive Behaviors; F428 - Other Obsessive-Compulsive Disorders; F429 - Obsessive- Compulsive Disorder Not Otherwise Specified; F43 - Severe Stress Reactions and Adjustment Disorders; F430 - Acute Stress Reaction; F431 - Post-Traumatic Stress Disorder; F432 - Adjustment Disorders; F438 - Other Reactions to Severe Stress; F439 - Unspecified Reaction to Severe Stress; F44 - Dissociative [Conversion] Disorders; F440 - Dissociative Amnesia; F441 - Dissociative Fugue; F442 - Dissociative Stupor; F443 - Trance and Possessive States; F444 - Dissociative Movement Disorders; F445 - Dissociative Seizures; F446 - Dissociative Anesthesia and Sensory Loss; F447 - Mixed Dissociative [Conversion] Disorder; F448 - Other Dissociative [Conversion] Disorders; F449 - Unspecified Dissociative [Conversion] Disorder; F45 - Somatoform Disorders; F450 - Somatization Disorder; F451 -  Undifferentiated Somatoform Disorder; F452 - Hypochondriacal Disorder; F453 - Somatoform Neurovegetative Disorder; F454 - Persistent Somatoform Pain Disorder; F458 - Other Somatoform Disorders; F459 – Somatoform Disorder Not Otherwise Specified; F48 - Other Neurotic Disorders; F480 - Neurasthenia; F481 - Depersonalization- Derealization Syndrome; F488 - Other Specified Neurotic Disorders; F489 - Neurotic Disorder Not Otherwise Specified; F50 - Neurotic Disorders; F501 - Anxiety Disorder; F502 - Panic Disorder; F503 - Phobic Disorder; F504 - Obsessive-Compulsive Disorder; F505 - Avoidant Disorder; F506 - Somatoform Disorder; F507 – Somatoform Disorder with Disturbance of Emotional Regulation; F508 - Somatoform Disorder with Disturbance of Emotional Regulation; F509 - Somatoform Disorder with Disturbance of Emotional Regulation; F510 - Somatoform Disorder  with Disturbance of Emotional Regulation; F511 - Somatoform Disorder with Disturbance of Emotional Regulation; F512 - Somatoform Disorder with Disturbance of Emotional Regulation; F5; F489 - Unspecified Neurotic Disorder; F50 - Feeding Disorders F500 - Anorexia Nervosa; F501 - Atypical Anorexia Nervosa; F502 - Bulimia Nervosa; F503 - Atypical Bulimia Nervosa; F504 - Hyperphagia Associated with Other Psychological Disorders; F505 – Vomiting Associated with Other Psychological Disorders; F508 - Other Eating Disorders; F509 - Unspecified Eating Disorder; F51 - Non-Organic Sleep Disorders Due to Emotional Factors; F510 - Non-Organic Insomnia; F511 - Non-Organic Hypersomnia; F512 - Sleep-Wake Cycle Disorder Due to Non-Organic Factors; F513 - Sleepwalking; F514 - Night Terrors; F515 - Nightmares; F518 - Other Sleep Disorders Due to Non-Organic Factors;  F519 - Sleep Disorder Due to Non-Organic Factors Not Specified; F52 - Sexual Dysfunction, Not Caused by Organic Disorder or Disease; F520 - Absence or Loss of Sexual Desire; F521 - Sexual Aversion and Absence of Sexual Pleasure; F522 - Failure of Genital Response; F523 - Orgasmic Dysfunction; F524 - Premature Ejaculation; F525 - Non-Organic Vaginismus; F526 - Non-Organic Dyspareunia; F527 - Excessive Sexual Appetite; F528 - Other Sexual Dysfunctions Not Due to Disorder or Organic Disease; F529 - Sexual Dysfunction Not Due to Disorder or Organic Disease, Unspecified; F53 - Mental and Behavioral Disorders Associated with the Puerperium, Not Classified Elsewhere; F530 - Mild Mental and Behavioral Disorders Associated with the Puerperium, Not Classified Elsewhere; F531 - Severe Mental and Behavioral Disorders Associated with the Puerperium, Not Classified Elsewhere; F538 - Other Mental and Behavioral Disorders Associated with the Puerperium, Not Classified Elsewhere; F539 - Mental  and Behavioral Disorder Associated with the Puerperium, Unspecified; F54 - Psychological or Behavioral Factors Associated with Disease or Disorder, Classified Elsewhere; F55 - Abuse of Non-Addictive Substances; F59 - Behavioral Syndromes Associated with Physiological Functioning Disorders, Classified Elsewhere; Classified Elsewhere; F55 - Abuse of Non-Dependence-Producing Substances; F59 - Behavioral Syndromes Associated With Disorders of Physiological Functions and Physical Factors  F60 - Specific Personality Disorders; F600 - Paranoid Personality; F601 - Schizoid Personality; F602 – Dissocial Personality; F603 - Emotionally Unstable Personality Disorder; F604 - Histrionic Personality; F605 – Anancastic Personality; F606 - Anxious [Avoidant] Personality; F607 - Dependent Personality; F608 - Other Specific Personality Disorders; F609 - Unspecified Personality Disorder; F61 - Mixed Personality Disorders and Other Personality Disorders; F62 - Enduring Personality Changes Not Attributable to Brain Injury or Disease; F620 – Enduring Personality Change Following a Catastrophic Experience; F621 - Enduring Personality Change Following Psychiatric Illness; F628 - Other Enduring Personality Changes; F629 - Enduring Personality Change, Not Specified; F63 - Impulse Control Disorders; F630 - Pathological Gambling; F631 - Pyromania; F632 - Pathological Stealing [Kleptomania]; F633 - Trichotillomania; F638 - Other Habit and Impulse Disorders; F639 - Habit and Impulse Disorder, Unspecified; F64 - Sex Identity Disorders; F640 - Transsexualism; F641 - Bivalent Transvestism; F642 - Childhood Sex Identity Disorder; F648 - Other Sex Identity Disorders; F649 - Unspecified Sex Identity Disorder; F65 - Sexual Preference Disorders; F650 - Fetishism; F651 - Fetishistic  Transvestism; F652 - Exhibitionism; F653 - Voyeurism; F654 - Pedophilia; F655 - Sadomasochism; F656 – Multiple Disorders of Sexual Preference; F658 - Other Disorders of Sexual Preference; F659 - Disorder of Sexual Preference, Unspecified; F66 - Psychological and Behavioral Disorders Associated with Sexual Development and Orientation; F660 - Sexual Maturation Disorder; F661 - Egodystonic Sexual Orientation; F662 - Sexual Relationship Disorder; F668 - Other Disorders of Psychosexual Development; F669 - Sexual Development Disorder, Unspecified; F68 - Other Personality and Behavioral Disorders in Adults; F680 - Physical Symptoms Enhanced by Psychological Factors; F681 - Deliberate Production or Simulation of Physical or Psychological Symptoms or Disabilities; F688 – Other Specified Personality and Behavioral Disorders in Adults; F69 - Adult Personality and Behavioral Disorder, Not  Specified; F70 - Mild Mental Retardation; F700 - Mild Mental Retardation - Mention of Absence of or Minimal Impairment of Behavior; F701 - Mild Mental Retardation - Significant Impairment of Behavior, Requiring Monitoring or Treatment; F708 - Mild Mental Retardation - Other Behavioral Impairments, Requiring Monitoring or Treatment; F709 - Mild Mental Retardation - No Mention of Absence of or Minimal Impairment of Behavior; F709 - Mild Mental Retardation - Other Behavioral Impairments, Requiring Monitoring or Treatment; F710 - Mild Mental Retardation - Other Behavioral Impairments, Requiring Monitoring or Treatment; F711 - Mild Mental Retardation – Other Behavioral Impairments, Requiring Monitoring or Treatment; F712 - Mild Mental Retardation - Other Behavioral Impairments, Requiring Monitoring or Treatment; F713 - Mild Mental Retardation - Other Behavioral Impairments,  Requiring Monitoring or Treatment; F714 - Mild Mental Retardation - Other Behavioral Impairments, Requiring Monitoring or Requiring Supervision or Treatment; F708 - Mild Mental Retardation - Other Behavioral Impairments;F709 - Mild Mental Retardation - No Mention of Behavioral Impairment; F71 - Moderate Mental Retardation; F710 - Moderate Mental Retardation Mention of Absence of or Minimal Behavioral Impairment; F711 - Moderate Mental Retardation - Significant Behavioral Impairment, Requiring Monitoring or Treatment; F718 - Moderate Mental Retardation - Other Behavioral Impairments; F719 - Moderate Mental Retardation - No Mention of Behavioral Impairment; F72 - Severe Mental Retardation; F720 - Severe Mental Retardation - Mention of Absence of or Minimal Behavioral Impairment; F721 - Severe Mental Retardation - Significant Behavioral Impairment, Requiring Surveillance or Treatment; F728 - Profound Mental Retardation - Other Behavioral Impairments; F729 - Profound Mental Retardation - No Mention of Absence of or Minimal Behavioral Impairment; Requiring Supervision or Treatment; F728 - Severe Mental Retardation - Other Behavioral Impairments; F729 - Severe Mental Retardation - No Mention of Behavioral Impairment; F73 - Profound Mental Retardation; F730 - Profound Mental Retardation No mention of absence or minimal behavioral impairment; F731 - Profound mental retardation - Significant behavioral impairment, requiring supervision or treatment; F738 - Profound mental retardation - Other behavioral impairments; F739 - Profound Mental Retardation - No Mention of Behavioral Impairment; F78 - Other Mental Retardation; F780 - Other Mental Retardation - Mention of Absence of or Minimal Behavioral Impairment; F781 - Other Mental Retardation - Significant Behavioral Impairment, Requiring Surveillance or Treatment; F788 - Other Mental Retardation - Other Behavioral Impairments; F789 - Other Mental Retardation - No Mention of Absence of or Minimal Behavioral Impairment; Requiring Supervision or Treatment; F788 - Other Mental Retardation - Other Behavioral Impairments; F789 - Other Mental Retardation - No Mention of Behavioral Impairment; F79 - Mental Retardation, Unspecified; F790 - Unspecified Mental Retardation - Mention of Absence or Minimal Behavioral Impairment; F791 - Unspecified Mental Retardation - Significant Behavioral Impairment, Requiring Monitoring or Treatment; F798 - Unspecified Mental Retardation - Other Behavioral Impairments; F799 - Unspecified Mental Retardation - No Mention of Behavioral Impairment; F79 - Unspecified Mental Retardation; Significant Behavioral Impairment, Requiring Monitoring or Treatment; F798 - Mental Retardation, Unspecified - Other Behavioral Impairments; F799 - Mental Retardation, Unspecified - No Mention of Behavioral Impairment; F80 - Specific Disorders of Speech and Language Development; F800 - Specific Disorder of Speech Articulation; F801 - Expressive Language Disorder; F802 - Receptive Language Disorder; F803 - Acquired Aphasia with Epilepsy [Landau-Kleffner Syndrome]; F808 - Other Speech or Language Development Disorders; F809 - Unspecified Speech or Language Development Disorder; F81 - Specific Disorders of School Skills Development; F810 - Specific Reading Disorder; F811 - Specific Spelling Disorder; F812 - Specific Arithmetic Skill Disorder; F813 - Mixed School Skills Disorder; F818 - Other Developmental Disorders of School Skills; F819 - Unspecified Developmental Disorder of School Skills; F82 - Specific Developmental Motor Disorder; F83 - Specific Mixed Developmental Disorders; F84 - Pervasive Developmental Disorders; F840 - Childhood Autism; F841 - Atypical Autism; F842 - Rett Syndrome; F843 - Other Childhood Disintegrative Disorder; F844 - Disorder with Hyperkinesia Associated with Mental Retardation and Stereotyped Movements; F845 - Asperger Syndrome; F848 - Other Pervasive Developmental Disorders; F849 - Pervasive Developmental Disorders Not Otherwise Specified; F88 - Other Psychological Developmental Disorders; F89 - Psychological Developmental Disorder Not Otherwise Specified; F90 - Hyperkinetic Disorders; F900 - Activity and Attention Disorders; F901 - Hyperkinetic Conduct Disorder; F908 - Other Hyperkinetic Disorders; F909 - Hyperkinetic Disorder Not Specified; F91 - Conduct Disorders; F910 - Conduct Disorder Restricted to the Family Context; F911 - Unsocialized Conduct Disorder; F912 - Socialized Conduct Disorder; F913 - Oppositional Defiant Disorder; F918 - Other Conduct Disorders; F919 - Conduct Disorder Not Otherwise Specified; F92 - Mixed Conduct and Emotional Disorders; F920 - Depressive Conduct Disorder; F928 - Other Mixed Conduct and Emotional Disorders; F929 - Mixed Conduct and Emotional Disorder Not Specified; F93 - Emotional Disorders with Specific Childhood Onset; F930 - Separation Anxiety Disorder; F931 - Childhood Phobic Anxiety Disorder; F932 - Childhood Social Anxiety Disorder; F933 - Sibling Rivalry Disorder; F938 - Other Childhood Emotional Disorders; F939 - Childhood Emotional Disorder Not Specified; F94 - Social Functioning Disorders with Onset Specified in Childhood or Adolescence; F940 - Selective Mutism; F941 - Reactive Attachment Disorder of Childhood; F942 - Childhood Fixation Disorder with Disinhibition; F948 - Other Disorders of Social Functioning in Childhood; F949 - Childhood Disorder of Social Functioning  F95 - Tics; F950 - Transient Tic Disorder; F951 - Chronic Motor or Vocal Tic Disorder; F952 - Combined Multiple Vocal and Motor Tic Disorder [Gilles de la Tourette Syndrome]; F958 - Other Tics; F959 - Tic Disorder, Unspecified; F98 - Other Behavioral and Emotional Disorders Usually Beginning in Childhood or Adolescence; F980 - Enuresis, Nonorganic; F981 - Encopresis, Nonorganic; F982 - Feeding Disorder in Childhood; F983 - Pica in Infants or Children; F984 - Motor Stereotypies; F985 - Stuttering; F986 - Precipitated Speech; F988 - Other Behavioral and Emotional Disorders with Usual Onset in Childhood or Adolescence; F989 - Unspecified Behavioral and Emotional Disorders with Usual Onset in Childhood or Adolescence; F990 - Other Specified Behavioral and Emotional Disorders with Usual Onset in Childhood or Adolescence; F991 - Other Specified Behavioral and Emotional Disorders with Usual Onset in Childhood or Adolescence; F992 - Other Specified Behavioral and Emotional Disorders with Usual Onset in Childhood or Adolescence; F993 - Other Specified Behavioral and Emotional Disorders with Usual Onset in Childhood or Adolescence; F994 - Other Specified Behavioral and Emotional Disorders with Usual Onset in Childhood or Adolescence; F995 - Other Specified Behavioral and Emotional  Disorders with Usual Onset in Childhood or Adolescence; F996 - Other Specified Behavioral and Emotional Disorders with Usual Onset in Childhood or Adolescence; F997 - Other And Emotional Disorders Specified With Usual Onset In Childhood Or Adolescence; F989 - Behavioral And Emotional Disorders Not Specified With Usual Onset In Childhood Or Adolescence; F99 - Mental Disorder Not Specified Elsewhere. |
